# Supplementary material for: Factors Influencing the Adoption of Smart Health Technologies for People With Dementia and Their Informal Caregivers: Scoping Review and Design Framework
Source: PubMed Central journal article supplement (PMC6716546; doi:10.2196/12192), 2019-04-30
Supplement: aging_v2i1e12192_app1.pdf [file aging_v2i1e12192_app1.pdf]

“ANNEXES”

Annexes 1. Keywords search terms organisation groups table.

| <b>Dementia related keywords</b> | <b>Caregiver related keywords</b> | <b>Smart Health technologies related keywords</b> |
|----------------------------------|-----------------------------------|---------------------------------------------------|
| <i>Dementia</i>                  | <i>Caregiver</i>                  | <i>Connected health</i>                           |
| <i>Alzheimer's disease</i>       | <i>Caregivers</i>                 | <i>mHealth</i>                                    |
| <i>Alzheimer disease</i>         | <i>Carer</i>                      | <i>eHealth</i>                                    |
| <i>Vascular dementia</i>         | <i>Carers</i>                     | <i>Medical informatics</i>                        |
| <i>Cognitive decline</i>         |                                   | <i>Medical Informatics Applications</i>           |
| <i>Cognitive impairment</i>      |                                   | <i>Telecare/ Tele care</i>                        |
| <i>Cognitive Dysfunction</i>     |                                   | <i>Telemedicine</i>                               |
| <i>Senile</i>                    |                                   | <i>Health technology</i>                          |
|                                  |                                   | <i>Biomedical Technology</i>                      |
|                                  |                                   | <i>Health technologies</i>                        |
|                                  |                                   | <i>e-care/ ecare</i>                              |
|                                  |                                   | <i>Telehealth/ Tele health</i>                    |
|                                  |                                   | <i>Online platform</i>                            |
|                                  |                                   | <i>Online health</i>                              |
|                                  |                                   | <i>Online system</i>                              |
|                                  |                                   | <i>Online systems</i>                             |
|                                  |                                   | <i>Mobile health</i>                              |
|                                  |                                   | <i>Healthcare platform</i>                        |
|                                  |                                   | <i>Health platform</i>                            |
|                                  |                                   | <i>Sensor technology</i>                          |
|                                  |                                   | <i>Sensor technologies</i>                        |
|                                  |                                   | <i>Sensor monitoring</i>                          |
|                                  |                                   | <i>Health monitoring</i>                          |
|                                  |                                   | <i>Health monitor</i>                             |
|                                  |                                   | <i>Health monitors</i>                            |
|                                  |                                   | <i>Distance monitoring</i>                        |
|                                  |                                   | <i>Distance health</i>                            |
|                                  |                                   | <i>Monitoring technology</i>                      |
|                                  |                                   | <i>Monitoring technologies</i>                    |
|                                  |                                   | <i>Remote monitoring</i>                          |
|                                  |                                   | <i>Remote monitor</i>                             |
|                                  |                                   | <i>Remote monitors</i>                            |
|                                  |                                   | <i>Remote care</i>                                |
|                                  |                                   | <i>Virtual care</i>                               |
|                                  |                                   | <i>Virtual health</i>                             |
|                                  |                                   | <i>Telephone monitoring</i>                       |
|                                  |                                   | <i>Assistive living</i>                           |
|                                  |                                   | <i>Assisted living</i>                            |
|                                  |                                   | <i>Assisted Living Facilities</i>                 |
|                                  |                                   | <i>Assistive technology</i>                       |
|                                  |                                   | <i>Assistive technologies</i>                     |
|                                  |                                   | <i>Wearable</i>                                   |
|                                  |                                   | <i>Wearables</i>                                  |
|                                  |                                   | <i>e-medicine/ emedicine</i>                      |



Annexes 3. Emerging themes results classification with reference to papers included in the review.

| Main themes                   | Subthemes                             | Papers where are referenced                                                                                                                                                                                                                                                                                                                                                                                                                                                                                                                                                                                                                                                                                                                                                                                                                                                                                                                                                                                                                                                                                                                                                                                                                                                                                                                                                                                                       |
|-------------------------------|---------------------------------------|-----------------------------------------------------------------------------------------------------------------------------------------------------------------------------------------------------------------------------------------------------------------------------------------------------------------------------------------------------------------------------------------------------------------------------------------------------------------------------------------------------------------------------------------------------------------------------------------------------------------------------------------------------------------------------------------------------------------------------------------------------------------------------------------------------------------------------------------------------------------------------------------------------------------------------------------------------------------------------------------------------------------------------------------------------------------------------------------------------------------------------------------------------------------------------------------------------------------------------------------------------------------------------------------------------------------------------------------------------------------------------------------------------------------------------------|
| Theme 1: Attitudinal aspects. | Positive attitudes towards technology | <p>Latino/Hispanic Alzheimer’s caregivers experiencing dementia-related dressing issues: corroboration of the Preservation of Self model and reactions to a “smart dresser” computer-based dressing aid. 2016, Mahoney DF. et al.</p> <p>The design of smart homes for people with dementia - User-interface aspects. 2005, Orpwood R. et al.</p> <p>Stages of use: consideration, initiation, utilization, and outcomes of an internet-mediated intervention. 2010, Chiu ML. et al.</p> <p>A cognitive prosthesis and communication support for people with dementia. 2004, Alm N. et al.</p> <p>Digital communication support and Alzheimer’s disease. 2017, Ekstrom A. et al.</p> <p>Preliminary study on Remote Assistance for People with Dementia at Home by Using Multimedia Contents. 2009, Hamada T. et al.</p> <p>An interactive web tool to facilitate shared decision making in dementia: Design issues perceived by caregivers and patients. 2014, Span M. et al.</p> <p>Electronic tracking for people with dementia: An exploratory study of the ethical issues experienced by carers in making decisions about age. 2014, White EB. et al.</p> <p>Ethical aspects of using GPS for tracking people with dementia: recommendations for practice. 2011, Landau R. et al.</p> <p>Families’ and Professional Caregivers’ Views of Using Advanced Technology to Track People with Dementia. 2010, Landau R. et al.</p> |

|  |  |                                                                                                                                                                                                                                                                                                                                                                                                                                                                                                                                                                                                                                                                                                                                                                                                                                                                                                                                                                                                                                                                                                                                                                                                                                                                                                                                                                                                                                                                                                                                                                       |
|--|--|-----------------------------------------------------------------------------------------------------------------------------------------------------------------------------------------------------------------------------------------------------------------------------------------------------------------------------------------------------------------------------------------------------------------------------------------------------------------------------------------------------------------------------------------------------------------------------------------------------------------------------------------------------------------------------------------------------------------------------------------------------------------------------------------------------------------------------------------------------------------------------------------------------------------------------------------------------------------------------------------------------------------------------------------------------------------------------------------------------------------------------------------------------------------------------------------------------------------------------------------------------------------------------------------------------------------------------------------------------------------------------------------------------------------------------------------------------------------------------------------------------------------------------------------------------------------------|
|  |  | <p>Ethical considerations in electronic monitoring of the cognitively impaired. 2017, Yang YT. et al.</p> <p>“It gives me a sense of independence” - Findings from Ireland on the use of assistive technology for people with dementia. 2007, Cahill S. et al.</p> <p>Robots to assist daily activities: views of older adults with Alzheimer’s disease and their caregivers. 2017, Wang RH. et al.</p> <p>Electronic tracking system and wandering in Alzheimer's disease: a case study. 2009, Fauconau V. et al.</p> <p>Caregivers' requirements for in-home robotic agent for supporting community-living elderly subjects with cognitive impairment. 2009, Fauconau V. et al.</p> <p>Older people with and without dementia participating in the development of an individual plan with digital calendar and message board. 2010, Holthe T. et al.</p> <p>Co-Conception Process of an Innovative Assistive Device to Track and Find Misplaced Everyday Objects for Older Adults with Cognitive Impairment: The TROUVE Project. 2016, Lopes P. et al.</p> <p>The results from a two-year case study of an information and communication technology support system for family caregivers. 2014, Lundberg S. et al.</p> <p>Dementia caregivers' responses to 2 Internet-based intervention programs. 2011, Marziali E. et al.</p> <p>Gerontechnology: Providing a helping hand when caring for cognitively impaired older adults-intermediate results from a controlled study on the satisfaction and acceptance of informal caregivers. 2012, Mitseva A. et al.</p> |
|--|--|-----------------------------------------------------------------------------------------------------------------------------------------------------------------------------------------------------------------------------------------------------------------------------------------------------------------------------------------------------------------------------------------------------------------------------------------------------------------------------------------------------------------------------------------------------------------------------------------------------------------------------------------------------------------------------------------------------------------------------------------------------------------------------------------------------------------------------------------------------------------------------------------------------------------------------------------------------------------------------------------------------------------------------------------------------------------------------------------------------------------------------------------------------------------------------------------------------------------------------------------------------------------------------------------------------------------------------------------------------------------------------------------------------------------------------------------------------------------------------------------------------------------------------------------------------------------------|

|  |  |                                                                                                                                                                                                                                                                                                                                                                                                                                                                                                                                                                                                                                                                                                                                                                                                                                                                                                                                                                                                                                                                                                                                                                                                                                                                                                                                                                                                                                                                                                                                                                                                            |
|--|--|------------------------------------------------------------------------------------------------------------------------------------------------------------------------------------------------------------------------------------------------------------------------------------------------------------------------------------------------------------------------------------------------------------------------------------------------------------------------------------------------------------------------------------------------------------------------------------------------------------------------------------------------------------------------------------------------------------------------------------------------------------------------------------------------------------------------------------------------------------------------------------------------------------------------------------------------------------------------------------------------------------------------------------------------------------------------------------------------------------------------------------------------------------------------------------------------------------------------------------------------------------------------------------------------------------------------------------------------------------------------------------------------------------------------------------------------------------------------------------------------------------------------------------------------------------------------------------------------------------|
|  |  | <p>Development of an Online Platform to Support the Network of Caregivers of People with Dementia. 2016, Verwey R. et al.</p> <p>Alzheimer's Disease rehabilitation using smartphones to improve patients' quality of life. 2013, Zmily A. et al.</p> <p>Participatory research to design a novel telehealth system to support the night-time needs of people with dementia: NOCTURNAL. 2013, Martin S. et al.</p> <p>The everyday use of assistive technology by people with dementia and their family carers: a qualitative study. 2015, Gibson G. et al.</p> <p>Evaluation of an activity monitoring system for people with dementia. 2007, Price C. et al.</p> <p>My, your and our needs for safety and security: relatives' reflections on using information and communication technology in dementia care. 2011, Olsson A. et al.</p> <p>Can smart homes extend people with Alzheimer's disease stay at home? 2016, Brunete A. et al.</p> <p>Managing wandering risk in people with dementia. 2015, Wan J. et al.</p> <p>Factors supporting the use of technology in daily life of home-living people with dementia. 2013, Riikonen M. et al.</p> <p>Awareness, requirements and barriers to use of Assistive Technology designed to enable independence of people suffering from Dementia [ATD]. 2012, Van den Heuvel E. et al.</p> <p>A web-based program for informal caregivers of persons with Alzheimer's Disease: An iterative User-Centered Design. 2014, Cristancho-Lacroix V. et al.</p> <p>Evaluation of video reminding technology for persons with dementia. 2011, Nugent C. et al.</p> |
|--|--|------------------------------------------------------------------------------------------------------------------------------------------------------------------------------------------------------------------------------------------------------------------------------------------------------------------------------------------------------------------------------------------------------------------------------------------------------------------------------------------------------------------------------------------------------------------------------------------------------------------------------------------------------------------------------------------------------------------------------------------------------------------------------------------------------------------------------------------------------------------------------------------------------------------------------------------------------------------------------------------------------------------------------------------------------------------------------------------------------------------------------------------------------------------------------------------------------------------------------------------------------------------------------------------------------------------------------------------------------------------------------------------------------------------------------------------------------------------------------------------------------------------------------------------------------------------------------------------------------------|

|                                              |                                                                                                                                                                                                                                                                                                                                                                                                                                                                                                                                                                                                                                                                                                                                                                                                                                      |
|----------------------------------------------|--------------------------------------------------------------------------------------------------------------------------------------------------------------------------------------------------------------------------------------------------------------------------------------------------------------------------------------------------------------------------------------------------------------------------------------------------------------------------------------------------------------------------------------------------------------------------------------------------------------------------------------------------------------------------------------------------------------------------------------------------------------------------------------------------------------------------------------|
|                                              | <p>Realization and user evaluation of a companion robot for people with mild cognitive impairments. 2013, Schroeter C. et al.</p> <p>Video Reminders as Cognitive Prosthetics for People with Dementia. 2011, O’Neill S. A. et al.</p> <p>Community-based trials of mobile solutions for the detection and management of cognitive decline. 2017, Boyd A. et al.</p> <p>Keeping In Touch Everyday [KITE] project: developing assistive technologies with people with dementia and their carers to promote independence. 2009, Robinson L. et al.</p> <p>A pilot study of the telecare medical support system as an intervention in dementia care: the views and experiences of primary caregivers. 2012, Chou HK. et al.</p> <p>Adapting Telemonitoring Technology Use for Older Adults: A Pilot Study. 2016, Williams K. et al.</p> |
| <p>Negative attitudes towards technology</p> | <p>“It gives me a sense of independence” - Findings from Ireland on the use of assistive technology for people with dementia. 2007, Cahill S. et al.</p> <p>Use of a multiparty web based videoconference support group for family caregivers: Innovative practice. 2015, Austrom M. G. et al.</p> <p>A web-based program for informal caregivers of persons with Alzheimer’s Disease: An iterative User-Centered Design. 2014, Cristancho-Lacroix V. et al.</p> <p>Design and the Digital Divide. Insights from 40 years in Computer Support for Older and Disabled People. 2011, Alan F. Newel. et al.</p> <p>An interactive web tool to facilitate shared decision making in dementia: design issues perceived by caregivers and patients. 2014, Span M. et al.</p>                                                               |

|  |  |                                                                                                                                                                                                                                                                                                                                                                                                                                                                                                                                                                                                                                                                                                                                                                                                                                                                                                                                                                                                                                                                                                                                                                                                                                                                                                                                                                                                                                                                                                                                                                                                                                                                                                  |
|--|--|--------------------------------------------------------------------------------------------------------------------------------------------------------------------------------------------------------------------------------------------------------------------------------------------------------------------------------------------------------------------------------------------------------------------------------------------------------------------------------------------------------------------------------------------------------------------------------------------------------------------------------------------------------------------------------------------------------------------------------------------------------------------------------------------------------------------------------------------------------------------------------------------------------------------------------------------------------------------------------------------------------------------------------------------------------------------------------------------------------------------------------------------------------------------------------------------------------------------------------------------------------------------------------------------------------------------------------------------------------------------------------------------------------------------------------------------------------------------------------------------------------------------------------------------------------------------------------------------------------------------------------------------------------------------------------------------------|
|  |  | <p>The identification of assistive technologies being used to support the daily occupations of community-dwelling older adults with dementia: a cross-sectional pilot study. 2013, Boger J. et al.</p> <p>Emerging roles for telemedicine and smart technologies in dementia care. 2015, Bossen AL. et al.</p> <p>Caregivers' requirements for in-home robotic agent for supporting community-living elderly subjects with cognitive impairment. F2009, aucounau V. et al.</p> <p>Electronic tracking for people with dementia: An exploratory study of the ethical issues experienced by carers in making decisions about usage. 2014, White EB. et al.</p> <p>Electronic tracking system and wandering in Alzheimer's disease: A case study. 2009, Faucounau V. et al.</p> <p>Ethical aspects of using GPS for tracking people with dementia: recommendations for practice. 2011, Landau R. et al.</p> <p>A systematic review of dementia focused assistive technology. 2015, Evans J. et al.</p> <p>Families' and Professional Caregivers' Views of Using Advanced Technology to Track People with Dementia. 2010, Landau R. et al.</p> <p>The everyday use of assistive technology by people with dementia and their family carers: a qualitative study. 2015, Gibson G. et al.</p> <p>Acceptance of wearable technology by people with Alzheimer's Disease: Issues and Accommodations. 2010, Mahoney EL. et al.</p> <p>mobileWAY – A system to reduce the feeling of temporary lonesomeness of persons with dementia and to foster inter-caregiver collaboration. 2013, Jordan P. et al.</p> <p>Not all who wander are lost: smart tracker for people with Dementia. 2016, Ng J. et al.</p> |
|--|--|--------------------------------------------------------------------------------------------------------------------------------------------------------------------------------------------------------------------------------------------------------------------------------------------------------------------------------------------------------------------------------------------------------------------------------------------------------------------------------------------------------------------------------------------------------------------------------------------------------------------------------------------------------------------------------------------------------------------------------------------------------------------------------------------------------------------------------------------------------------------------------------------------------------------------------------------------------------------------------------------------------------------------------------------------------------------------------------------------------------------------------------------------------------------------------------------------------------------------------------------------------------------------------------------------------------------------------------------------------------------------------------------------------------------------------------------------------------------------------------------------------------------------------------------------------------------------------------------------------------------------------------------------------------------------------------------------|

|  |  |                                                                                                                                                                                                                                                                                                                                                                                                                                                                                                                                                                                                                                                                                                                                                                                                                                                                                                                                                                                                                                                                                                                                                                                                                                                                                                                                                                                                                                                                                                                                      |
|--|--|--------------------------------------------------------------------------------------------------------------------------------------------------------------------------------------------------------------------------------------------------------------------------------------------------------------------------------------------------------------------------------------------------------------------------------------------------------------------------------------------------------------------------------------------------------------------------------------------------------------------------------------------------------------------------------------------------------------------------------------------------------------------------------------------------------------------------------------------------------------------------------------------------------------------------------------------------------------------------------------------------------------------------------------------------------------------------------------------------------------------------------------------------------------------------------------------------------------------------------------------------------------------------------------------------------------------------------------------------------------------------------------------------------------------------------------------------------------------------------------------------------------------------------------|
|  |  | <p>Older adults' and caregivers' perspectives on in-home monitoring technology. 2016, Epstein I. et al.</p> <p>Keeping In Touch Everyday [KITE] project: developing assistive technologies with people with dementia and their carers to promote independence. 2009, Robinson L. et al.</p> <p>Technology in Dementia Care. 2007, Cahill S. et al.</p> <p>The ethical evaluation of assistive technology for practitioners: a checklist arising from a participatory study with people with dementia, family and professionals. 2012, Godwin B. et al.</p> <p>The use of smartwatches for health monitoring in home-based dementia care. 2015, Boletsis C. et al.</p> <p>Ethical considerations in electronic monitoring of the cognitively impaired. 2017, Yang YT. et al.</p> <p>Electronic tracking system and wandering in Alzheimer's disease: a case study. 2009, Fauconau V. et al.</p> <p>Caregivers' requirements for in-home robotic agent for supporting community-living elderly subjects with cognitive impairment. 2009, Fauconau V. et al.</p> <p>Understanding Internet Use Among Dementia Caregivers: Results of Secondary Data Analysis Using the US Caregiver Survey Data. 2015, Kim H. et al.</p> <p>Technology for home dementia care: A prototype locating system put to the test. 2017, Megges H. et al.</p> <p>Not all who wander are lost: Smart tracker for people with dementia. 2016, Ng J. et al.</p> <p>Evaluation of video reminding technology for persons with dementia. 2011, Nugent C. et al.</p> |
|--|--|--------------------------------------------------------------------------------------------------------------------------------------------------------------------------------------------------------------------------------------------------------------------------------------------------------------------------------------------------------------------------------------------------------------------------------------------------------------------------------------------------------------------------------------------------------------------------------------------------------------------------------------------------------------------------------------------------------------------------------------------------------------------------------------------------------------------------------------------------------------------------------------------------------------------------------------------------------------------------------------------------------------------------------------------------------------------------------------------------------------------------------------------------------------------------------------------------------------------------------------------------------------------------------------------------------------------------------------------------------------------------------------------------------------------------------------------------------------------------------------------------------------------------------------|



|                                 |                         |                                                                                                                                                                                                                                                                                                                                                                                                                                                                                                                                                                                                                                                                                                                                                                                                                                  |
|---------------------------------|-------------------------|----------------------------------------------------------------------------------------------------------------------------------------------------------------------------------------------------------------------------------------------------------------------------------------------------------------------------------------------------------------------------------------------------------------------------------------------------------------------------------------------------------------------------------------------------------------------------------------------------------------------------------------------------------------------------------------------------------------------------------------------------------------------------------------------------------------------------------|
|                                 |                         | <p>Video Reminders as Cognitive Prosthetics for People with Dementia. 2011, O'Neill S. A. et al.</p> <p>The design of smart homes for people with dementia - User-interface aspects. 2005, Orpwood R. et al.</p> <p>Realization and user evaluation of a companion robot for people with mild cognitive impairments. 2013, Schroeter C. et al.</p> <p>Designing a spoken dialogue interface to an intelligent cognitive assistant for people with dementia. 2016, Wolters M.K. et al.</p> <p>A Predictive Model for Assistive Technology Adoption for People With Dementia. 2014, Zhang S. et al.</p>                                                                                                                                                                                                                            |
| <p>Theme 2: Ethical issues.</p> | <p>Privacy concerns</p> | <p>A cognitive prosthesis and communication support for people with dementia. 2004, Alm N. et al.</p> <p>A pilot study of the telecare medical support system as an intervention in dementia care: the views and experiences of primary caregivers. 2012, Chou HK. et al.</p> <p>Emerging roles for telemedicine and smart technologies in dementia care. 2015, Bossen AL. et al.</p> <p>Electronic tracking system and wandering in Alzheimer's disease: a case study. 2009, Fauconau V. et al.</p> <p>Caregivers' requirements for in-home robotic agent for supporting community-living elderly subjects with cognitive impairment. 2009, Fauconau V. et al.</p> <p>Participatory research to design a novel telehealth system to support the night-time needs of people with dementia: NOCTURNAL. 2013, Martin S. et al.</p> |

|  |  |                                                                                                                                                                                                                                                                                                                                                                                                                                                                                                                                                                                                                                                                                                                                                                                                                                                                                                                                                                                                                                                                                                                                                                                                                                                                                                                                                                                                                                                                                                                                                                                                            |
|--|--|------------------------------------------------------------------------------------------------------------------------------------------------------------------------------------------------------------------------------------------------------------------------------------------------------------------------------------------------------------------------------------------------------------------------------------------------------------------------------------------------------------------------------------------------------------------------------------------------------------------------------------------------------------------------------------------------------------------------------------------------------------------------------------------------------------------------------------------------------------------------------------------------------------------------------------------------------------------------------------------------------------------------------------------------------------------------------------------------------------------------------------------------------------------------------------------------------------------------------------------------------------------------------------------------------------------------------------------------------------------------------------------------------------------------------------------------------------------------------------------------------------------------------------------------------------------------------------------------------------|
|  |  | <p>Can smart homes extend people with Alzheimer's disease stay at home? 2016, Brunete A. et al.</p> <p>Caregivers' requirements for in-home robotic agent for supporting community-living elderly subjects with cognitive impairment. 2009, Faucounau V. et al.</p> <p>Electronic tracking for people with dementia: an exploratory study of the ethical issues experienced by carers in making decisions about usage. 2014, White EB. et al.</p> <p>Evaluation of an activity monitoring system for people with dementia. 2007, Price C. et al.</p> <p>Families' and Professional Caregivers' Views of Using Advanced Technology to Track People with Dementia. 2010, Landau R. et al.</p> <p>The everyday use of assistive technology by people with dementia and their family carers: a qualitative study. 2015, Gibson G. et al.</p> <p>Managing wandering risk in people with dementia. 2015, Wan J. et al.</p> <p>The perceptions of cognitively impaired patients and their caregivers of a home telecare system. 2015, Mehrabian et al.</p> <p>A pilot study on the use of tracking technology: Feasibility, acceptability, and benefits for people in early stages of dementia and their informal caregivers. 2012, Pot AM. et al.</p> <p>Keeping In Touch Everyday [KITE] project: developing assistive technologies with people with dementia and their carers to promote independence. 2009, Robinson L. et al.</p> <p>Clinical practice standards and ethical issues applied to a virtual group intervention for spousal caregivers of people with Alzheimer's. 2007, Serafini JD. et al.</p> |
|--|--|------------------------------------------------------------------------------------------------------------------------------------------------------------------------------------------------------------------------------------------------------------------------------------------------------------------------------------------------------------------------------------------------------------------------------------------------------------------------------------------------------------------------------------------------------------------------------------------------------------------------------------------------------------------------------------------------------------------------------------------------------------------------------------------------------------------------------------------------------------------------------------------------------------------------------------------------------------------------------------------------------------------------------------------------------------------------------------------------------------------------------------------------------------------------------------------------------------------------------------------------------------------------------------------------------------------------------------------------------------------------------------------------------------------------------------------------------------------------------------------------------------------------------------------------------------------------------------------------------------|

|  |                          |                                                                                                                                                                                                                                                                                                                                                                                                                                                                                                                                                                                                                                                                                                                                                                                                                                                                                                                                                                                                                                                                                                                                                                                                                                                               |
|--|--------------------------|---------------------------------------------------------------------------------------------------------------------------------------------------------------------------------------------------------------------------------------------------------------------------------------------------------------------------------------------------------------------------------------------------------------------------------------------------------------------------------------------------------------------------------------------------------------------------------------------------------------------------------------------------------------------------------------------------------------------------------------------------------------------------------------------------------------------------------------------------------------------------------------------------------------------------------------------------------------------------------------------------------------------------------------------------------------------------------------------------------------------------------------------------------------------------------------------------------------------------------------------------------------|
|  |                          | <p>Dementia and Social Sustainability: Challenges for Software Engineering. 2015, Sawyer, P. et al.</p> <p>The electronic, personalizable Rosetta system for dementia care: exploring the user-friendliness, usefulness and impact. 2016, Hattink B. et al.</p> <p>Dementia and Social Sustainability: Challenges for Software Engineering. 2015, Sawyer P. et al.</p>                                                                                                                                                                                                                                                                                                                                                                                                                                                                                                                                                                                                                                                                                                                                                                                                                                                                                        |
|  | <p>Autonomy concerns</p> | <p>“It gives me a sense of independence” - Findings from Ireland on the use of assistive technology for people with dementia. 2007, Cahill S. et al.</p> <p>A web-based program for informal caregivers of persons with Alzheimer’s Disease: An iterative User-Centered Design. 2014, Cristancho-Lacroix V. et al.</p> <p>An interactive web tool to facilitate shared decision making in dementia: design issues perceived by caregivers and patients. 2014, Span M. et al.</p> <p>The identification of assistive technologies being used to support the daily occupations of community-dwelling older adults with dementia: a cross-sectional pilot study. 2013, Boger J. et al.</p> <p>Emerging roles for telemedicine and smart technologies in dementia care. 2015, Bossen AL. et al.</p> <p>Caregivers’ requirements for in-home robotic agent for supporting community-living elderly subjects with cognitive impairment. F2009, aucounau V. et al.</p> <p>Electronic tracking for people with dementia: An exploratory study of the ethical issues experienced by carers in making decisions about usage. 2014, White EB. et al.</p> <p>Electronic tracking system and wandering in Alzheimer’s disease: A case study. 2009, Faucounau V. et al.</p> |

|  |  |                                                                                                                                                                                                                                                                                                                                                                                                                                                                                                                                                                                                                                                                                                                                                                                                                                                                                                                                                                                                                                                                                                                                                                                                                                                                                                                                                                                                                                                                                                                                                                                                                                      |
|--|--|--------------------------------------------------------------------------------------------------------------------------------------------------------------------------------------------------------------------------------------------------------------------------------------------------------------------------------------------------------------------------------------------------------------------------------------------------------------------------------------------------------------------------------------------------------------------------------------------------------------------------------------------------------------------------------------------------------------------------------------------------------------------------------------------------------------------------------------------------------------------------------------------------------------------------------------------------------------------------------------------------------------------------------------------------------------------------------------------------------------------------------------------------------------------------------------------------------------------------------------------------------------------------------------------------------------------------------------------------------------------------------------------------------------------------------------------------------------------------------------------------------------------------------------------------------------------------------------------------------------------------------------|
|  |  | <p>Aspects of socially assistive robots design for dementia care. 2014, Nestorov N. et al.</p> <p>Emerging roles for telemedicine and smart technologies in dementia care. 2015, Bossen AL. et al.</p> <p>Ethical aspects of using GPS for tracking people with dementia: recommendations for practice. 2011, Landau R. et al.</p> <p>A systematic review of dementia focused assistive technology. 2015, Evans J. et al.</p> <p>Families' and Professional Caregivers' Views of Using Advanced Technology to Track People with Dementia. 2010, Landau R. et al.</p> <p>The everyday use of assistive technology by people with dementia and their family carers: a qualitative study. 2015, Gibson G. et al.</p> <p>Acceptance of wearable technology by people with Alzheimer's Disease: Issues and Accommodations. 2010, Mahoney EL. et al.</p> <p>mobileWAY – A system to reduce the feeling of temporary lonesomeness of persons with dementia and to foster inter-caregiver collaboration. 2013, Jordan P. et al.</p> <p>Not all who wander are lost: smart tracker for people with Dementia. 2016, Ng J. et al.</p> <p>Older adults' and caregivers' perspectives on in-home monitoring technology. 2016, Epstein I. et al.</p> <p>Keeping In Touch Everyday [KITE] project: developing assistive technologies with people with dementia and their carers to promote independence. 2009, Robinson L. et al.</p> <p>Technology in Dementia Care. 2007, Cahill S. et al.</p> <p>The ethical evaluation of assistive technology for practitioners: a checklist arising from a participatory study with people with dementia,</p> |
|--|--|--------------------------------------------------------------------------------------------------------------------------------------------------------------------------------------------------------------------------------------------------------------------------------------------------------------------------------------------------------------------------------------------------------------------------------------------------------------------------------------------------------------------------------------------------------------------------------------------------------------------------------------------------------------------------------------------------------------------------------------------------------------------------------------------------------------------------------------------------------------------------------------------------------------------------------------------------------------------------------------------------------------------------------------------------------------------------------------------------------------------------------------------------------------------------------------------------------------------------------------------------------------------------------------------------------------------------------------------------------------------------------------------------------------------------------------------------------------------------------------------------------------------------------------------------------------------------------------------------------------------------------------|

|                                               |                                |                                                                                                                                                                                                                                                                                                                                                                                                                                                                                                                                        |
|-----------------------------------------------|--------------------------------|----------------------------------------------------------------------------------------------------------------------------------------------------------------------------------------------------------------------------------------------------------------------------------------------------------------------------------------------------------------------------------------------------------------------------------------------------------------------------------------------------------------------------------------|
|                                               |                                | <p>family and professionals. 2012, Godwin B. et al.</p> <p>Technology-driven interventions for caregivers of persons with dementia: a systematic review. 2013, Godwin B. et al.</p> <p>The use of smartwatches for health monitoring in home-based dementia care. 2015, Boletsis C. et al.</p> <p>Ethical considerations in electronic monitoring of the cognitively impaired. 2017, Yang YT. et al.</p> <p>Development of an Online Platform to Support the Network of Caregivers of People with Dementia. 2016, Verwey R. et al.</p> |
|                                               | <p>Data ownership concerns</p> | <p>Electronic tracking for people with dementia: An exploratory study of the ethical issues experienced by carers in making decisions about usage. 2014, White EB. et al.</p> <p>Ethical considerations in electronic monitoring of the cognitively impaired. 2017, Yang YT. et al.</p> <p>The electronic, personalizable Rosetta system for dementia care: exploring the user-friendliness, usefulness and impact. 2016, Hattink B. et al.</p>                                                                                        |
| <p>Theme 3: Technology-related challenges</p> | <p>Design</p>                  | <p>The identification of assistive technologies being used to support the daily occupations of community-dwelling older adults with dementia: a cross-sectional pilot study. 2013. Boger J. et al.</p> <p>An Online Platform to Support the Network of Caregivers of People with Dementia. 2017, Boessen.</p> <p>Smart Homes Design for People with Dementia. 2015, Amiribesheli M. et al.</p> <p>A cognitive prosthesis and communication support for people with dementia. 2004, Alm N. et al.</p>                                   |

|  |                                                                                                                                                                                                                                                                                                                                                                                                                                                                                                                                                                                                                                                                                                                                                                                                                                                                                                                                                                                                                                                                                                                                                                                                                                                                                                                                                                                                                                                                                                                                                                                                                            |
|--|----------------------------------------------------------------------------------------------------------------------------------------------------------------------------------------------------------------------------------------------------------------------------------------------------------------------------------------------------------------------------------------------------------------------------------------------------------------------------------------------------------------------------------------------------------------------------------------------------------------------------------------------------------------------------------------------------------------------------------------------------------------------------------------------------------------------------------------------------------------------------------------------------------------------------------------------------------------------------------------------------------------------------------------------------------------------------------------------------------------------------------------------------------------------------------------------------------------------------------------------------------------------------------------------------------------------------------------------------------------------------------------------------------------------------------------------------------------------------------------------------------------------------------------------------------------------------------------------------------------------------|
|  | <p>Towards the development of a technology for art therapy and dementia: Definition of needs and design constraints. 2010, Mihailidis A. et al.</p> <p>Evaluation of the Digital Alzheimer Center: Testing Usability and Usefulness of an Online Portal for Patients with Dementia and Their Carers. 2016, Hattink B. et al.</p> <p>The electronic, personalizable Rosetta system for dementia care: exploring the user-friendliness, usefulness and impact. 2016, Hattink B. et al.</p> <p>Emerging roles for telemedicine and smart technologies in dementia care. 2015, Bossen AL. et al.</p> <p>Remember to remember: A feasibility study adapting wearable technology to the needs of people aged 65 and older with mild cognitive impairment (MCI) and Alzheimer's dementia. 2015, Maier A. M. et al.</p> <p>Co-Conception Process of an Innovative Assistive Device to Track and Find Misplaced Everyday Objects for Older Adults with Cognitive Impairment: The TROUVE Project. 2016, Lopes P. et al.</p> <p>Developing smartphone applications for people with Alzheimer's disease. 2010, Armstrong N. et al.</p> <p>Can smart homes extend people with Alzheimer's disease stay at home? 2016, Brunete A. et al.</p> <p>Encouraging Innovation for Assistive Health Technologies in Dementia: Barriers, Enablers and Next Steps to Be Taken. 2016, Egan KJ. et al.</p> <p>The everyday use of assistive technology by people with dementia and their family carers: a qualitative study. 2015, Gibson G. et al.</p> <p>Latino/Hispanic Alzheimer's caregivers experiencing dementia-related dressing issues:</p> |
|--|----------------------------------------------------------------------------------------------------------------------------------------------------------------------------------------------------------------------------------------------------------------------------------------------------------------------------------------------------------------------------------------------------------------------------------------------------------------------------------------------------------------------------------------------------------------------------------------------------------------------------------------------------------------------------------------------------------------------------------------------------------------------------------------------------------------------------------------------------------------------------------------------------------------------------------------------------------------------------------------------------------------------------------------------------------------------------------------------------------------------------------------------------------------------------------------------------------------------------------------------------------------------------------------------------------------------------------------------------------------------------------------------------------------------------------------------------------------------------------------------------------------------------------------------------------------------------------------------------------------------------|

|  |                                                                                                                                                                                                                                                                                                                                                                                                                                                                                                                                                                                                                                                                                                                                                                                                                                                                                                                                                                                                                                                                                                                                                                                                                                                                                                                                                                                                                                                                                                                                                                                                                                                      |
|--|------------------------------------------------------------------------------------------------------------------------------------------------------------------------------------------------------------------------------------------------------------------------------------------------------------------------------------------------------------------------------------------------------------------------------------------------------------------------------------------------------------------------------------------------------------------------------------------------------------------------------------------------------------------------------------------------------------------------------------------------------------------------------------------------------------------------------------------------------------------------------------------------------------------------------------------------------------------------------------------------------------------------------------------------------------------------------------------------------------------------------------------------------------------------------------------------------------------------------------------------------------------------------------------------------------------------------------------------------------------------------------------------------------------------------------------------------------------------------------------------------------------------------------------------------------------------------------------------------------------------------------------------------|
|  | <p>corroboration of the Preservation of Self model and reactions to a “smart dresser” computer-based dressing aid. 2016, Mahoney DF. et al.</p> <p>Prototype Development of a Responsive Emotive Sensing System [DRESS] to aid older persons with dementia to dress independently. 2015, Mahoney DF. et al.</p> <p>The perceptions of cognitively impaired patients and their caregivers of a home telecare system. 2015, Mehrabian S. et al.</p> <p>My, your and our needs for safety and security: relatives’ reflections on using information and communication technology in dementia care. 2011, Olsson A. et al.</p> <p>Design and the Digital Divide. Insights from 40 years in Computer Support for Older and Disabled People. 2011, Alan F. Newel. et al.</p> <p>The design of smart homes for people with dementia - User-interface aspects. 2005, Orpwood R. et al.</p> <p>Augmented reality annotations to assist persons with Alzheimers and their caregivers. 2013, Quintana E. et al.</p> <p>Personalized reminiscence therapy for patients with Alzheimer's disease using a computerized system. 2011, Sarne-Fleischmann V. et al.</p> <p>Community-based trials of mobile solutions for the detection and management of cognitive decline. 2017, Boyd A. et al.</p> <p>Participation of end users in the design of assistive technology for people with mild to severe cognitive problems; the European Rosetta project. 2014, Meiland FJM. et al.</p> <p>Dementia-Related and Other Factors to Be Taken into Account When Developing ICT Support for People with Dementia – Lessons from Field Trials. 2010, Dröes R-M. et al.</p> |
|--|------------------------------------------------------------------------------------------------------------------------------------------------------------------------------------------------------------------------------------------------------------------------------------------------------------------------------------------------------------------------------------------------------------------------------------------------------------------------------------------------------------------------------------------------------------------------------------------------------------------------------------------------------------------------------------------------------------------------------------------------------------------------------------------------------------------------------------------------------------------------------------------------------------------------------------------------------------------------------------------------------------------------------------------------------------------------------------------------------------------------------------------------------------------------------------------------------------------------------------------------------------------------------------------------------------------------------------------------------------------------------------------------------------------------------------------------------------------------------------------------------------------------------------------------------------------------------------------------------------------------------------------------------|

|  |                         |                                                                                                                                                                                                                                                                                                                                                                                                                                                                                                                                                                                                                                                                                                                                                                                                                                                                                                                                                                                                                                                                                                                                                                                                                                                                                                      |
|--|-------------------------|------------------------------------------------------------------------------------------------------------------------------------------------------------------------------------------------------------------------------------------------------------------------------------------------------------------------------------------------------------------------------------------------------------------------------------------------------------------------------------------------------------------------------------------------------------------------------------------------------------------------------------------------------------------------------------------------------------------------------------------------------------------------------------------------------------------------------------------------------------------------------------------------------------------------------------------------------------------------------------------------------------------------------------------------------------------------------------------------------------------------------------------------------------------------------------------------------------------------------------------------------------------------------------------------------|
|  |                         | <p>An interactive web tool to facilitate shared decision making in dementia: design issues perceived by caregivers and patients. 2014, Span M. et al.</p> <p>Online self-management interventions for chronically ill patients: cognitive impairment and technology issues. 2014, Archer N. et al.</p>                                                                                                                                                                                                                                                                                                                                                                                                                                                                                                                                                                                                                                                                                                                                                                                                                                                                                                                                                                                               |
|  | <p>Digital Literacy</p> | <p>Awareness, requirements and barriers to use of Assistive Technology designed to enable independence of people suffering from Dementia [ATD]. 2012, Van den Heuvel E. et al.</p> <p>My, your and our needs for safety and security: relatives' reflections on using information and communication technology in dementia care. 2011, Olsson A. et al.</p> <p>The identification of assistive technologies being used to support the daily occupations of community-dwelling older adults with dementia: a cross-sectional pilot study. 2014, Boger J. et al.</p> <p>A web-based program for informal caregivers of persons with Alzheimer's Disease: An iterative User-Centered Design. 2014, Cristancho-Lacroix V. et al.</p> <p>A Knowledge-Driven Approach to Predicting Technology Adoption among Persons with Dementia. 2014, Patterson T. et al.</p> <p>Assessing design features of a graphical user interface for a social assistive robot for older adults with cognitive impairment. 2012, Pino M et al.</p> <p>Key Factors for a Framework Supporting the Design, Provision, and Assessment of Assistive Technology for Dementia Care. 2013, Pino M. et al.</p> <p>Barriers to Co-Designing Mobile Technology with Persons with Dementia and Their Carers. 2016, O'Connor S. et al.</p> |



|  |                      |                                                                                                                                                                                                                                                                                                                                                                                                                                                                                                                                                                                                                                                                                                                                                                                                                                                                                                                                                                                                                                                                                                                                                                                                                                                                                                                                                                                                                                                                                                                                                                          |
|--|----------------------|--------------------------------------------------------------------------------------------------------------------------------------------------------------------------------------------------------------------------------------------------------------------------------------------------------------------------------------------------------------------------------------------------------------------------------------------------------------------------------------------------------------------------------------------------------------------------------------------------------------------------------------------------------------------------------------------------------------------------------------------------------------------------------------------------------------------------------------------------------------------------------------------------------------------------------------------------------------------------------------------------------------------------------------------------------------------------------------------------------------------------------------------------------------------------------------------------------------------------------------------------------------------------------------------------------------------------------------------------------------------------------------------------------------------------------------------------------------------------------------------------------------------------------------------------------------------------|
|  |                      | <p>An Ambient Assisted Living Approach in Designing Domiciliary Services Combined With Innovative Technologies for Patients With Alzheimer’s Disease: A Case Study. 2015, Cavallo F. et al.</p> <p>A systematic review of dementia focused assistive technology. 2015, Evans J. et al.</p> <p>The everyday use of assistive technology by people with dementia and their family carers: a qualitative study. 2015, Gibson G. et al.</p> <p>The design of intelligent in-home assistive technologies: Assessing the needs of older adults with dementia and their caregivers. 2011, Czarnuch S. et al.</p> <p>Electronic tracking system and wandering in Alzheimer’s disease: A case study. 2009, Faucounau V. et al.</p> <p>Use of Handheld Technology by Older Adult Caregivers as Part of a Virtual Support Network. 2007, Becker SA. et al.</p> <p>Adapting Telemonitoring Technology Use for Older Adults: A Pilot Study. 2016, Williams K. et al.</p> <p>Keeping In Touch Everyday [KITE] project: developing assistive technologies with people with dementia and their carers to promote independence. 2009, Robinson L. et al.</p> <p>In the Information Age, do dementia caregivers get the information they need? Semi-structured interviews to determine informal caregivers' education needs, barriers, and preferences. 2016, Peterson, K., et al.</p> <p>The ethical evaluation of assistive technology for practitioners: a checklist arising from a participatory study with people with dementia, family and professionals. 2012, Godwin B. et al.</p> |
|  | Perceived usefulness | “It gives me a sense of independence” - Findings from Ireland on the use of assistive                                                                                                                                                                                                                                                                                                                                                                                                                                                                                                                                                                                                                                                                                                                                                                                                                                                                                                                                                                                                                                                                                                                                                                                                                                                                                                                                                                                                                                                                                    |

|                                       |                   |                                                                                                                                                                                                                                                                                                                                                                                                                                                                                                                                                                                                                                                                                                                                                                                                                                                                                                                                                                                                                                                                                                                                                                                                                                                                                                                                                                                            |
|---------------------------------------|-------------------|--------------------------------------------------------------------------------------------------------------------------------------------------------------------------------------------------------------------------------------------------------------------------------------------------------------------------------------------------------------------------------------------------------------------------------------------------------------------------------------------------------------------------------------------------------------------------------------------------------------------------------------------------------------------------------------------------------------------------------------------------------------------------------------------------------------------------------------------------------------------------------------------------------------------------------------------------------------------------------------------------------------------------------------------------------------------------------------------------------------------------------------------------------------------------------------------------------------------------------------------------------------------------------------------------------------------------------------------------------------------------------------------|
|                                       |                   | <p>technology for people with dementia. 2007, Cahill S. et al</p> <p>Emerging roles for telemedicine and smart technologies in dementia care. 2015, Bossen AL. et al.</p> <p>The identification of assistive technologies being used to support the daily occupations of community-dwelling older adults with dementia: a cross-sectional pilot study. 2014, Boger J. et al.</p> <p>Assistive technologies for coping at home and increased quality of life for persons with dementia. 2014, Hellman R. et al.</p> <p>Usability of a Wearable Camera System for Dementia Family Caregivers. 2015, Matthews JT. et al.</p> <p>Use of Handheld Technology by Older Adult Caregivers as Part of a Virtual Support Network. 2007, Becker SA. et al.</p> <p>Alzheimer’s Caregiver Support Online: Lessons learned, initial findings and future directions. 2003, Glueckauf RL.</p> <p>First steps in designing an all-in-one ICT-based device for persons with cognitive impairment: evaluation of the first mock-up. 2016, Boman IL. et al.</p> <p>Approaches to Incorporating Assistive Technologies into Dementia Care. 2012, Sugihara T. et al.</p> <p>Design of a website for home modifications for older persons with dementia. 2014, Kort HSM. et al.</p> <p>Development of an Online Platform to Support the Network of Caregivers of People with Dementia. 2016, Verwey R. et al.</p> |
| Theme 4: Condition-related challenges | Cognitive decline | <p>“It gives me a sense of independence” - Findings from Ireland on the use of assistive technology for people with dementia. 2007, Cahill S. et al</p>                                                                                                                                                                                                                                                                                                                                                                                                                                                                                                                                                                                                                                                                                                                                                                                                                                                                                                                                                                                                                                                                                                                                                                                                                                    |

|  |  |                                                                                                                                                                                                                                                                                                                                                                                                                                                                                                                                                                                                                                                                                                                                                                                                                                                                                                                                                                                                                                                                                                                                                                                                                                                                                                                                                                                                                                                                                                                                                                                                                                        |
|--|--|----------------------------------------------------------------------------------------------------------------------------------------------------------------------------------------------------------------------------------------------------------------------------------------------------------------------------------------------------------------------------------------------------------------------------------------------------------------------------------------------------------------------------------------------------------------------------------------------------------------------------------------------------------------------------------------------------------------------------------------------------------------------------------------------------------------------------------------------------------------------------------------------------------------------------------------------------------------------------------------------------------------------------------------------------------------------------------------------------------------------------------------------------------------------------------------------------------------------------------------------------------------------------------------------------------------------------------------------------------------------------------------------------------------------------------------------------------------------------------------------------------------------------------------------------------------------------------------------------------------------------------------|
|  |  | <p>A Knowledge-Driven Approach to Predicting Technology Adoption among Persons with Dementia. 2014, Patterson T. et al.</p> <p>Dementia and Robotics: People with Advancing Dementia and Their Carers Driving an Exploration into an Engineering Solution to Maintaining Safe Exercise Regimes. 2016, Cooper C. et al.</p> <p>Alzheimer's Caregiver Support Online: Lessons learned, initial findings and future directions. 2003, Glueckauf RL.</p> <p>Acceptability of a guided self-help Internet intervention for family caregivers: mastery over dementia. 2015, Pot AM. et al.</p> <p>First steps in designing an all-in-one ICT-based device for persons with cognitive impairment: evaluation of the first mock-up. 2016, Boman IL. et al.</p> <p>Online self-management interventions for chronically ill patients: cognitive impairment and technology issues. 2014, Archer N. et al.</p> <p>Dementia-Related and Other Factors to Be Taken into Account When Developing ICT Support for People with Dementia – Lessons from Field Trials. 2010, Dröes R-M. et al.</p> <p>Awareness, requirements and barriers to use of Assistive Technology designed to enable independence of people suffering from Dementia [ATD]. 2012, Van den Heuvel E. et al.</p> <p>Assessing design features of a graphical user interface for a social assistive robot for older adults with cognitive impairment. 2012, Pino M et al.</p> <p>The identification of assistive technologies being used to support the daily occupations of community-dwelling older adults with dementia: a cross-sectional pilot study. 2013. Boger J. et al.</p> |
|--|--|----------------------------------------------------------------------------------------------------------------------------------------------------------------------------------------------------------------------------------------------------------------------------------------------------------------------------------------------------------------------------------------------------------------------------------------------------------------------------------------------------------------------------------------------------------------------------------------------------------------------------------------------------------------------------------------------------------------------------------------------------------------------------------------------------------------------------------------------------------------------------------------------------------------------------------------------------------------------------------------------------------------------------------------------------------------------------------------------------------------------------------------------------------------------------------------------------------------------------------------------------------------------------------------------------------------------------------------------------------------------------------------------------------------------------------------------------------------------------------------------------------------------------------------------------------------------------------------------------------------------------------------|

|  |                                                                                                                                                                                                                                                                                                                                                                                                                                                                                                                                                                                                                                                                                                                                                                                                                                                                                                                                                                                                                                                                                                                                                                                                                                                                                                                                                                                                                                                                                                                                                                                                                      |
|--|----------------------------------------------------------------------------------------------------------------------------------------------------------------------------------------------------------------------------------------------------------------------------------------------------------------------------------------------------------------------------------------------------------------------------------------------------------------------------------------------------------------------------------------------------------------------------------------------------------------------------------------------------------------------------------------------------------------------------------------------------------------------------------------------------------------------------------------------------------------------------------------------------------------------------------------------------------------------------------------------------------------------------------------------------------------------------------------------------------------------------------------------------------------------------------------------------------------------------------------------------------------------------------------------------------------------------------------------------------------------------------------------------------------------------------------------------------------------------------------------------------------------------------------------------------------------------------------------------------------------|
|  | <p>Emerging roles for telemedicine and smart technologies in dementia care. 2015, Bossen AL. et al.</p> <p>Community-based trials of mobile solutions for the detection and management of cognitive decline. 2017, Boyd A. et al.</p> <p>An Investigation into the Usability of the STAR Training and Re-skilling Website for Carers of Persons with Dementia. 2014, Boys K. et al.</p> <p>Stages of use: consideration, initiation, utilization, and outcomes of an internet-mediated intervention. 2010, Chiu ML. et al.</p> <p>Theorizing the health service usage behavior of family caregivers: a qualitative study of an internet-based intervention. 2011, Chiu, T. M.</p> <p>Electronic tracking for people with dementia: An exploratory study of the ethical issues experienced by carers in making decisions about usage. 2014, White EB. et al.</p> <p>Acceptance of Wearable Technology by People With Alzheimer’s Disease: Issues and Accommodations. 2010, Mahoney EL. et al.</p> <p>Mobile App Development and Usability Research to Help Dementia and Alzheimer Patients. 2013, Yamagata C. et al.</p> <p>Personalized Technology to Support Older Adults With and Without Cognitive Impairment Living at Home. 2015, Kerssens C. et al.</p> <p>Towards Dementia-friendly Smart Homes. 2016, Amiribesheli M. et al.</p> <p>Use of Handheld Technology by Older Adult Caregivers as Part of a Virtual Support Network. 2007, Becker SA. et al.</p> <p>Encouraging Innovation for Assistive Health Technologies in Dementia: Barriers, Enablers and Next Steps to Be Taken. 2016, Egan KJ. et al.</p> |
|--|----------------------------------------------------------------------------------------------------------------------------------------------------------------------------------------------------------------------------------------------------------------------------------------------------------------------------------------------------------------------------------------------------------------------------------------------------------------------------------------------------------------------------------------------------------------------------------------------------------------------------------------------------------------------------------------------------------------------------------------------------------------------------------------------------------------------------------------------------------------------------------------------------------------------------------------------------------------------------------------------------------------------------------------------------------------------------------------------------------------------------------------------------------------------------------------------------------------------------------------------------------------------------------------------------------------------------------------------------------------------------------------------------------------------------------------------------------------------------------------------------------------------------------------------------------------------------------------------------------------------|

|  |                                        |                                                                                                                                                                                                                                                                                                                                                                                                                                                                                                                                                                                                                                                                                                                                                                                                                                                                                                                                                                                                                                                                                          |
|--|----------------------------------------|------------------------------------------------------------------------------------------------------------------------------------------------------------------------------------------------------------------------------------------------------------------------------------------------------------------------------------------------------------------------------------------------------------------------------------------------------------------------------------------------------------------------------------------------------------------------------------------------------------------------------------------------------------------------------------------------------------------------------------------------------------------------------------------------------------------------------------------------------------------------------------------------------------------------------------------------------------------------------------------------------------------------------------------------------------------------------------------|
|  |                                        | <p>A pilot study of the telecare medical support system as an intervention in dementia care: the views and experiences of primary caregivers. 2012, Chou HK. et al.</p> <p>Participation of end users in the design of assistive technology for people with mild to severe cognitive problems; the European Rosetta project. 2014, Meiland FJM. et al.</p> <p>Factors supporting the use of technology in daily life of home-living people with dementia. 2013, Riikonen M. et al.</p> <p>Stay in touch: an in context evaluation of a smartphone interface designed for people with dementia. 2014, Brankaert R. et al.</p> <p>Assistive technologies at home for people with a memory disorder." Dementia (London). 2016, Nauha, L., et al.</p> <p>A collaborative patient-carer interface for generating home based rules for self-management. 2015, Beattie, M., et al.</p> <p>(State-of-the-art assistive technology for people with dementia. 2013, Phua, C., et al.</p> <p>Ethical considerations in electronic monitoring of the cognitively impaired. 2017, Yang YT. et al.</p> |
|  | <p>Aging and physical capabilities</p> | <p>“It gives me a sense of independence” - Findings from Ireland on the use of assistive technology for people with dementia. 2007, Cahill S. et al</p> <p>A Knowledge-Driven Approach to Predicting Technology Adoption among Persons with Dementia. 2014, Patterson T. et al.</p> <p>Alzheimer’s Caregiver Support Online: Lessons learned, initial findings and future directions. 2003, Glueckauf RL.</p> <p>Acceptability of a guided self-help Internet intervention for family caregivers: mastery over dementia. 2015, Pot AM. et al.</p>                                                                                                                                                                                                                                                                                                                                                                                                                                                                                                                                        |

|  |  |                                                                                                                                                                                                                                                                                                                                                                                                                                                                                                                                                                                                                                                                                                                                                                                                                                                                                                                                                                                                                                                                                                                                                                                                                                                                                                                                                                                                                                                                                                                                                                               |
|--|--|-------------------------------------------------------------------------------------------------------------------------------------------------------------------------------------------------------------------------------------------------------------------------------------------------------------------------------------------------------------------------------------------------------------------------------------------------------------------------------------------------------------------------------------------------------------------------------------------------------------------------------------------------------------------------------------------------------------------------------------------------------------------------------------------------------------------------------------------------------------------------------------------------------------------------------------------------------------------------------------------------------------------------------------------------------------------------------------------------------------------------------------------------------------------------------------------------------------------------------------------------------------------------------------------------------------------------------------------------------------------------------------------------------------------------------------------------------------------------------------------------------------------------------------------------------------------------------|
|  |  | <p>First steps in designing an all-in-one ICT-based device for persons with cognitive impairment: evaluation of the first mock-up. 2016, Boman IL. et al.</p> <p>Online self-management interventions for chronically ill patients: cognitive impairment and technology issues. 2014, Archer N. et al.</p> <p>Dementia-Related and Other Factors to Be Taken into Account When Developing ICT Support for People with Dementia – Lessons from Field Trials. 2010, Dröes R-M. et al.</p> <p>Awareness, requirements and barriers to use of Assistive Technology designed to enable independence of people suffering from Dementia [ATD]. 2012, Van den Heuvel E. et al.</p> <p>Assessing design features of a graphical user interface for a social assistive robot for older adults with cognitive impairment. 2012, Pino M et al.</p> <p>The identification of assistive technologies being used to support the daily occupations of community-dwelling older adults with dementia: a cross-sectional pilot study. 2013. Boger J. et al.</p> <p>Emerging roles for telemedicine and smart technologies in dementia care. 2015, Bossen AL. et al.</p> <p>Community-based trials of mobile solutions for the detection and management of cognitive decline. 2017, Boyd A. et al.</p> <p>An investigation into the usability of the STAR training and re-skilling website for persons with dementia. 2014, Boyd A. et al.</p> <p>An Investigation into the Usability of the STAR Training and Re-skilling Website for Carers of Persons with Dementia. 2014, Boys K. et al.</p> |
|--|--|-------------------------------------------------------------------------------------------------------------------------------------------------------------------------------------------------------------------------------------------------------------------------------------------------------------------------------------------------------------------------------------------------------------------------------------------------------------------------------------------------------------------------------------------------------------------------------------------------------------------------------------------------------------------------------------------------------------------------------------------------------------------------------------------------------------------------------------------------------------------------------------------------------------------------------------------------------------------------------------------------------------------------------------------------------------------------------------------------------------------------------------------------------------------------------------------------------------------------------------------------------------------------------------------------------------------------------------------------------------------------------------------------------------------------------------------------------------------------------------------------------------------------------------------------------------------------------|

|  |                                                                                                                                                                                                                                                                                                                                                                                                                                                                                                                                                                                                                                                                                                                                                                                                                                                                                                                                                                                                                                                                                                                                                                                                                                                                                                                                                                                                                                                                                                                                                                                                                                                                        |
|--|------------------------------------------------------------------------------------------------------------------------------------------------------------------------------------------------------------------------------------------------------------------------------------------------------------------------------------------------------------------------------------------------------------------------------------------------------------------------------------------------------------------------------------------------------------------------------------------------------------------------------------------------------------------------------------------------------------------------------------------------------------------------------------------------------------------------------------------------------------------------------------------------------------------------------------------------------------------------------------------------------------------------------------------------------------------------------------------------------------------------------------------------------------------------------------------------------------------------------------------------------------------------------------------------------------------------------------------------------------------------------------------------------------------------------------------------------------------------------------------------------------------------------------------------------------------------------------------------------------------------------------------------------------------------|
|  | <p>Stages of use: consideration, initiation, utilization, and outcomes of an internet-mediated intervention. 2010, Chiu ML. et al.</p> <p>Theorizing the health service usage behavior of family caregivers: a qualitative study of an internet-based intervention. 2011, Chiu, T. M.</p> <p>Electronic tracking for people with dementia: An exploratory study of the ethical issues experienced by carers in making decisions about usage. 2014, White EB. et al.</p> <p>Acceptance of Wearable Technology by People With Alzheimer’s Disease: Issues and Accommodations. 2010, Mahoney EL. et al.</p> <p>Prototype Development of a Responsive Emotive Sensing System (DRESS) to aid older persons with dementia to dress independently. 2015, Mahoney D. F. et al.</p> <p>Mobile App Development and Usability Research to Help Dementia and Alzheimer Patients. 2013, Yamagata C. et al.</p> <p>Personalized Technology to Support Older Adults With and Without Cognitive Impairment Living at Home. 2015, Kerssens C. et al.</p> <p>Towards Dementia-friendly Smart Homes. 2016, Amiribesheli M. et al.</p> <p>Use of Handheld Technology by Older Adult Caregivers as Part of a Virtual Support Network. 2007, Becker SA. et al.</p> <p>Encouraging Innovation for Assistive Health Technologies in Dementia: Barriers, Enablers and Next Steps to Be Taken. 2016, Egan KJ. et al.</p> <p>A pilot study of the telecare medical support system as an intervention in dementia care: the views and experiences of primary caregivers. 2012, Chou HK. et al.</p> <p>Participation of end users in the design of assistive technology for people with mild to</p> |
|--|------------------------------------------------------------------------------------------------------------------------------------------------------------------------------------------------------------------------------------------------------------------------------------------------------------------------------------------------------------------------------------------------------------------------------------------------------------------------------------------------------------------------------------------------------------------------------------------------------------------------------------------------------------------------------------------------------------------------------------------------------------------------------------------------------------------------------------------------------------------------------------------------------------------------------------------------------------------------------------------------------------------------------------------------------------------------------------------------------------------------------------------------------------------------------------------------------------------------------------------------------------------------------------------------------------------------------------------------------------------------------------------------------------------------------------------------------------------------------------------------------------------------------------------------------------------------------------------------------------------------------------------------------------------------|

|  |                                                                                                                                                                                                                                                                                                                                                                                                                                                                                                                                                                                                                                                                                                                                                                                                                                                                                                                                                                                                                                                                                                                                                                                                                                                                                                                                                                                                          |
|--|----------------------------------------------------------------------------------------------------------------------------------------------------------------------------------------------------------------------------------------------------------------------------------------------------------------------------------------------------------------------------------------------------------------------------------------------------------------------------------------------------------------------------------------------------------------------------------------------------------------------------------------------------------------------------------------------------------------------------------------------------------------------------------------------------------------------------------------------------------------------------------------------------------------------------------------------------------------------------------------------------------------------------------------------------------------------------------------------------------------------------------------------------------------------------------------------------------------------------------------------------------------------------------------------------------------------------------------------------------------------------------------------------------|
|  | <p>severe cognitive problems; the European Rosetta project. 2014, Meiland FJM. et al.</p> <p>Factors supporting the use of technology in daily life of home-living people with dementia. 2013, Riikonen M. et al.</p> <p>Stay in touch: an in context evaluation of a smartphone interface designed for people with dementia. 2014, Brankaert R. et al.</p> <p>Assistive technologies at home for people with a memory disorder." Dementia (London). 2016, Nauha, L., et al.</p> <p>A collaborative patient-carer interface for generating home based rules for self-management. 2015, Beattie, M., et al.</p> <p>(State-of-the-art assistive technology for people with dementia. 2013, Phua, C., et al.</p> <p>Robin: Enabling independence for individuals with cognitive disabilities using voice assistive technology. 2017, Carroll C. et al.</p> <p>Usability assessment of a pervasive system to assist caregivers in dealing with repetitive behaviors of patients with dementia. 2011, Navarro R. et al.</p> <p>The design of smart homes for people with dementia - User-interface aspects. 2005, Orpwood R. et al.</p> <p>Dementia and Social Sustainability: Challenges for Software Engineering. 2015, Sawyer P. et al.</p> <p>Caregivers' requirements for in-home robotic agent for supporting community-living elderly subjects with cognitive impairment. 2009, Fauconau V. et al.</p> |
|--|----------------------------------------------------------------------------------------------------------------------------------------------------------------------------------------------------------------------------------------------------------------------------------------------------------------------------------------------------------------------------------------------------------------------------------------------------------------------------------------------------------------------------------------------------------------------------------------------------------------------------------------------------------------------------------------------------------------------------------------------------------------------------------------------------------------------------------------------------------------------------------------------------------------------------------------------------------------------------------------------------------------------------------------------------------------------------------------------------------------------------------------------------------------------------------------------------------------------------------------------------------------------------------------------------------------------------------------------------------------------------------------------------------|



|  |                             |                                                                                                                                                                                                                                                                                                                                                                                                                                                                                                                                                                                                                                                                                                                                                                                                                                                                                                                                                                                                                                                                                                                                                                                                                                                                                                                                                                                                                                                                                                                                                                                                   |
|--|-----------------------------|---------------------------------------------------------------------------------------------------------------------------------------------------------------------------------------------------------------------------------------------------------------------------------------------------------------------------------------------------------------------------------------------------------------------------------------------------------------------------------------------------------------------------------------------------------------------------------------------------------------------------------------------------------------------------------------------------------------------------------------------------------------------------------------------------------------------------------------------------------------------------------------------------------------------------------------------------------------------------------------------------------------------------------------------------------------------------------------------------------------------------------------------------------------------------------------------------------------------------------------------------------------------------------------------------------------------------------------------------------------------------------------------------------------------------------------------------------------------------------------------------------------------------------------------------------------------------------------------------|
|  | <p>Condition acceptance</p> | <p>“It gives me a sense of independence” - Findings from Ireland on the use of assistive technology for people with dementia. 2007, Cahill S. et al.</p> <p>A web-based program for informal caregivers of persons with Alzheimer’s Disease: An iterative User-Centered Design. 2014, Cristancho-Lacroix V. et al.</p> <p>A web-based psychoeducational program for informal caregivers of patients with Alzheimer’s disease: a pilot randomized controlled trial. 2015, Cristancho-Lacroix V. et al.</p> <p>A pilot study on the use of tracking technology: Feasibility, acceptability, and benefits for people in early stages of dementia and their informal caregivers. 2012, Pot AM. et al.</p> <p>Approaches to Incorporating Assistive Technologies into Dementia Care. 2012, Sugihara T. et al.</p> <p>Awareness, requirements and barriers to use of Assistive Technology designed to enable independence of people suffering from Dementia [ATD]. 2012, Van den Heuvel E. et al.</p> <p>The identification of assistive technologies being used to support the daily occupations of community-dwelling older adults with dementia: a cross-sectional pilot study. 2013, Boger J. et al.</p> <p>Emerging roles for telemedicine and smart technologies in dementia care. 2015, Bossen AL. et al.</p> <p>An Ambient Assisted Living Approach in Designing Domiciliary Services Combined With Innovative Technologies for Patients With Alzheimer’s Disease: A Case Study. 2015, Cavallo F. et al.</p> <p>Development and Initial Evaluation of the Web-Based Self-Management Program</p> |
|--|-----------------------------|---------------------------------------------------------------------------------------------------------------------------------------------------------------------------------------------------------------------------------------------------------------------------------------------------------------------------------------------------------------------------------------------------------------------------------------------------------------------------------------------------------------------------------------------------------------------------------------------------------------------------------------------------------------------------------------------------------------------------------------------------------------------------------------------------------------------------------------------------------------------------------------------------------------------------------------------------------------------------------------------------------------------------------------------------------------------------------------------------------------------------------------------------------------------------------------------------------------------------------------------------------------------------------------------------------------------------------------------------------------------------------------------------------------------------------------------------------------------------------------------------------------------------------------------------------------------------------------------------|

|  |  |                                                                                                                                                                                                                                                                                                                                                                                                                                                                                                                                                                                                                                                                                                                                                                                                                                                                                                                                                                                                                                                                                                                                                                                                                                                                                                                                                                                                                                                                                                                                                                                                                                                                 |
|--|--|-----------------------------------------------------------------------------------------------------------------------------------------------------------------------------------------------------------------------------------------------------------------------------------------------------------------------------------------------------------------------------------------------------------------------------------------------------------------------------------------------------------------------------------------------------------------------------------------------------------------------------------------------------------------------------------------------------------------------------------------------------------------------------------------------------------------------------------------------------------------------------------------------------------------------------------------------------------------------------------------------------------------------------------------------------------------------------------------------------------------------------------------------------------------------------------------------------------------------------------------------------------------------------------------------------------------------------------------------------------------------------------------------------------------------------------------------------------------------------------------------------------------------------------------------------------------------------------------------------------------------------------------------------------------|
|  |  | <p>“Partner in Balance” for Family Caregivers of People With Early Stage Dementia: An Exploratory Mixed-Methods Study. 2016, Boots LMM. et al.</p> <p>Development and Initial Evaluation of the Web-Based Self-Management Program "Partner in Balance" for Family Caregivers of People With Early Stage Dementia: An Exploratory Mixed-Methods Study. 2016, Boots LM. et al.</p> <p>Electronic tracking system and wandering in Alzheimer’s disease: A case study. 2009, Faucounau V. et al.</p> <p>A systematic review of dementia focused assistive technology. 2015, Evans J. et al.</p> <p>Families’ and Professional Caregivers’ Views of Using Advanced Technology to Track People with Dementia. 2010, Landau R. et al.</p> <p>Gaps between Assistive Technologies and Dementia Care. 2012, Sugihara T. et al.</p> <p>The everyday use of assistive technology by people with dementia and their family carers: a qualitative study. 2015, Gibson G. et al.</p> <p>Latino/Hispanic Alzheimer’s caregivers experiencing dementia-related dressing issues: corroboration of the Preservation of Self model and reactions to a ‘smart dresser’ computer-based dressing aid. 2016, Mahoney DF. et al.</p> <p>Acceptance of Wearable Technology by People With Alzheimer’s Disease: Issues and Accommodations. 2010, Mahoney EL. et al.</p> <p>The perceptions of cognitively impaired patients and their caregivers of a home telecare system. 2015, Mehrabian et al.</p> <p>Participation of end users in the design of assistive technology for people with mild to severe cognitive problems; the European Rosetta project. 2014, Meiland FJM. et al.</p> |
|--|--|-----------------------------------------------------------------------------------------------------------------------------------------------------------------------------------------------------------------------------------------------------------------------------------------------------------------------------------------------------------------------------------------------------------------------------------------------------------------------------------------------------------------------------------------------------------------------------------------------------------------------------------------------------------------------------------------------------------------------------------------------------------------------------------------------------------------------------------------------------------------------------------------------------------------------------------------------------------------------------------------------------------------------------------------------------------------------------------------------------------------------------------------------------------------------------------------------------------------------------------------------------------------------------------------------------------------------------------------------------------------------------------------------------------------------------------------------------------------------------------------------------------------------------------------------------------------------------------------------------------------------------------------------------------------|

|               |              |                                                                                                                                                                                                                                                                                                                                                                                                                                                                                                                                                                                                                                                                                                                                                                                                                                                                                                                                                                                                                                                                                                                                                                                                                                                                       |
|---------------|--------------|-----------------------------------------------------------------------------------------------------------------------------------------------------------------------------------------------------------------------------------------------------------------------------------------------------------------------------------------------------------------------------------------------------------------------------------------------------------------------------------------------------------------------------------------------------------------------------------------------------------------------------------------------------------------------------------------------------------------------------------------------------------------------------------------------------------------------------------------------------------------------------------------------------------------------------------------------------------------------------------------------------------------------------------------------------------------------------------------------------------------------------------------------------------------------------------------------------------------------------------------------------------------------|
|               |              | <p>Factors supporting the use of technology in daily life of home-living people with dementia. 2013, Riikonen M. et al.</p> <p>Robots to assist daily activities: views of older adults with Alzheimer’s disease and their caregivers. 2017, Wang RH. et al.</p> <p>Stay in touch: an in-context evaluation of a smartphone interface designed for people with dementia. 2014, Brankaert R. et al.</p> <p>Technology in Dementia Care. 2007, Cahill S. et al.</p> <p>The design of intelligent in-home assistive technologies: Assessing the needs of older adults with dementia and their caregivers. 2011, Czarnuch S. et al.</p> <p>Using participatory design to determine the needs of informal caregivers for smart home user interfaces. 2012, Hwang AS. et al.</p> <p>Co-Designing Ambient Assisted Living (AAL) Environments: Unravelling the Situated Context of Informal Dementia Care. 2015, Hwang AS. et al.</p> <p>Performance of Daily Activities by Older Adults with Dementia: The Role of an Assistive Robot. 2013, Begum M.</p> <p>Pervasive assistive technology for people with dementia: a UCD case. 2016, Thorpe, J. R. et al.</p> <p>Older adults’ and caregivers’ perspectives on in-home monitoring technology. 2016, Epstein I. et al.</p> |
| Theme 5: Gaps | Market needs | <p>The design of smart homes for people with dementia - User-interface aspects. 2005, Orpwood R. et al.</p> <p>Towards a Wearable Cognitive Prosthesis to Support “What” and “Who” Type Memory Activities. 2006, Kawamura T. et a.</p>                                                                                                                                                                                                                                                                                                                                                                                                                                                                                                                                                                                                                                                                                                                                                                                                                                                                                                                                                                                                                                |

|  |                 |                                                                                                                                                                                                                                                                                                                                                                                                                                                                                                                                                                                                                                                                                                                                                                                                                                                                                                                                                                                                                                                                                                                                                                                                              |
|--|-----------------|--------------------------------------------------------------------------------------------------------------------------------------------------------------------------------------------------------------------------------------------------------------------------------------------------------------------------------------------------------------------------------------------------------------------------------------------------------------------------------------------------------------------------------------------------------------------------------------------------------------------------------------------------------------------------------------------------------------------------------------------------------------------------------------------------------------------------------------------------------------------------------------------------------------------------------------------------------------------------------------------------------------------------------------------------------------------------------------------------------------------------------------------------------------------------------------------------------------|
|  |                 | <p>A cognitive prosthesis and communication support for people with dementia. 2004, Alm N. et al.</p> <p>Emerging roles for telemedicine and smart technologies in dementia care. 2015, Bossen AL. et al.</p> <p>Managing wandering risk in people with dementia. 2015, Wan J. et al.</p>                                                                                                                                                                                                                                                                                                                                                                                                                                                                                                                                                                                                                                                                                                                                                                                                                                                                                                                    |
|  | <p>Research</p> | <p>Gerontechnology: Providing a helping hand when caring for cognitively impaired older adults-intermediate results from a controlled study on the satisfaction and acceptance of informal caregivers. 2012, Mitseva A. et al.</p> <p>An interactive web tool to facilitate shared decision making in dementia: Design issues perceived by caregivers and patients. 2014, Span M. et al.</p> <p>A cognitive prosthesis and communication support for people with dementia. 2004, Alm N. et al.</p> <p>An interactive web tool to facilitate shared decision making in dementia: design issues perceived by caregivers and patients. 2014, Span M. et al.</p> <p>Emerging roles for telemedicine and smart technologies in dementia care. 2015, Bossen AL. et al.</p> <p>Design and the Digital Divide. Insights from 40 years in Computer Support for Older and Disabled People. 2011, Alan F. Newel. et al.</p> <p>Digital communication support and Alzheimer’s disease. 2017, Ekstrom A. et al.</p> <p>Design of a website for home modifications for older persons with dementia. 2014, Kort HSM. et al.</p> <p>Participatory research to design a novel telehealth system to support the night-time</p> |

|                                 |                                                                                                                                                                                                                                                                                                                                                                                                                                                                                                                                                                                                                                                                                                                                                                                                                                                                                                                                                                                                                                                                                            |
|---------------------------------|--------------------------------------------------------------------------------------------------------------------------------------------------------------------------------------------------------------------------------------------------------------------------------------------------------------------------------------------------------------------------------------------------------------------------------------------------------------------------------------------------------------------------------------------------------------------------------------------------------------------------------------------------------------------------------------------------------------------------------------------------------------------------------------------------------------------------------------------------------------------------------------------------------------------------------------------------------------------------------------------------------------------------------------------------------------------------------------------|
|                                 | <p>needs of people with dementia: NOCTURNAL. 2013, Martin S. et al.</p> <p>Positive design of smart interactive fabric artifacts for people with dementia. 2017, Mann G. et al.</p> <p>Clinical practice standards and ethical issues applied to a virtual group intervention for spousal caregivers of people with Alzheimer's. 2007, Serafini JD. et al.</p> <p>The ethical evaluation of assistive technology for practitioners: a checklist arising from a participatory study with people with dementia, family and professionals. 2012, Godwin B. et al.</p> <p>Towards Dementia-friendly Smart Homes. 2016, Amiribesheli M. et al.</p> <p>Smart Homes Design for People with Dementia. 2015, Amiribesheli M. et al.</p> <p>Safe walking technology for people with dementia: What do they want? 2013, Holbø, K., et al.</p> <p>Use of an online community to provide support to caregivers of people with dementia. 2014, Pagan-Ortiz, M. E., et al.</p> <p>Towards a Wearable Cognitive Prosthesis to Support "What" and "Who" Type Memory Activities. 2006, Kawamura T. et a.</p> |
| <p>Good practice guidelines</p> | <p>The results from a two-year case study of an information and communication technology support system for family caregivers. 2014, Lundberg S. et al.</p> <p>Acceptability of a guided self-help Internet intervention for family caregivers: mastery over dementia. 2015, Pot AM. et al.</p> <p>Dementia caregivers' responses to 2 Internet-based intervention programs. 2011, Marziali E. et al.</p> <p>Aspects of socially assistive robots design for dementia care. 2014, Nestorov N. et al.</p>                                                                                                                                                                                                                                                                                                                                                                                                                                                                                                                                                                                   |

|  |  |                                                                                                                                                                                                                                                                                                                                                                                                                                                                             |
|--|--|-----------------------------------------------------------------------------------------------------------------------------------------------------------------------------------------------------------------------------------------------------------------------------------------------------------------------------------------------------------------------------------------------------------------------------------------------------------------------------|
|  |  | <p>Emerging roles for telemedicine and smart technologies in dementia care. 2015, Bossen AL. et al.</p> <p>Ethical aspects of using GPS for tracking people with dementia: recommendations for practice. 2011, Landau R. et al.</p> <p>A systematic review of dementia focused assistive technology. 2015, Evans J. et al.</p> <p>The everyday use of assistive technology by people with dementia and their family carers: a qualitative study. 2015, Gibson G. et al.</p> |
|--|--|-----------------------------------------------------------------------------------------------------------------------------------------------------------------------------------------------------------------------------------------------------------------------------------------------------------------------------------------------------------------------------------------------------------------------------------------------------------------------------|
